# Supplementary material
Source: HighWire-hosted journal article supplement (https://jnm.snmjournals.org/highwire/filestream/95186/field_highwire_adjunct_files/0/191965_Supplemental_Data.pdf)
Supplement: 191965_Supplemental_Data.pdf [file 191965_Supplemental_Data.pdf]

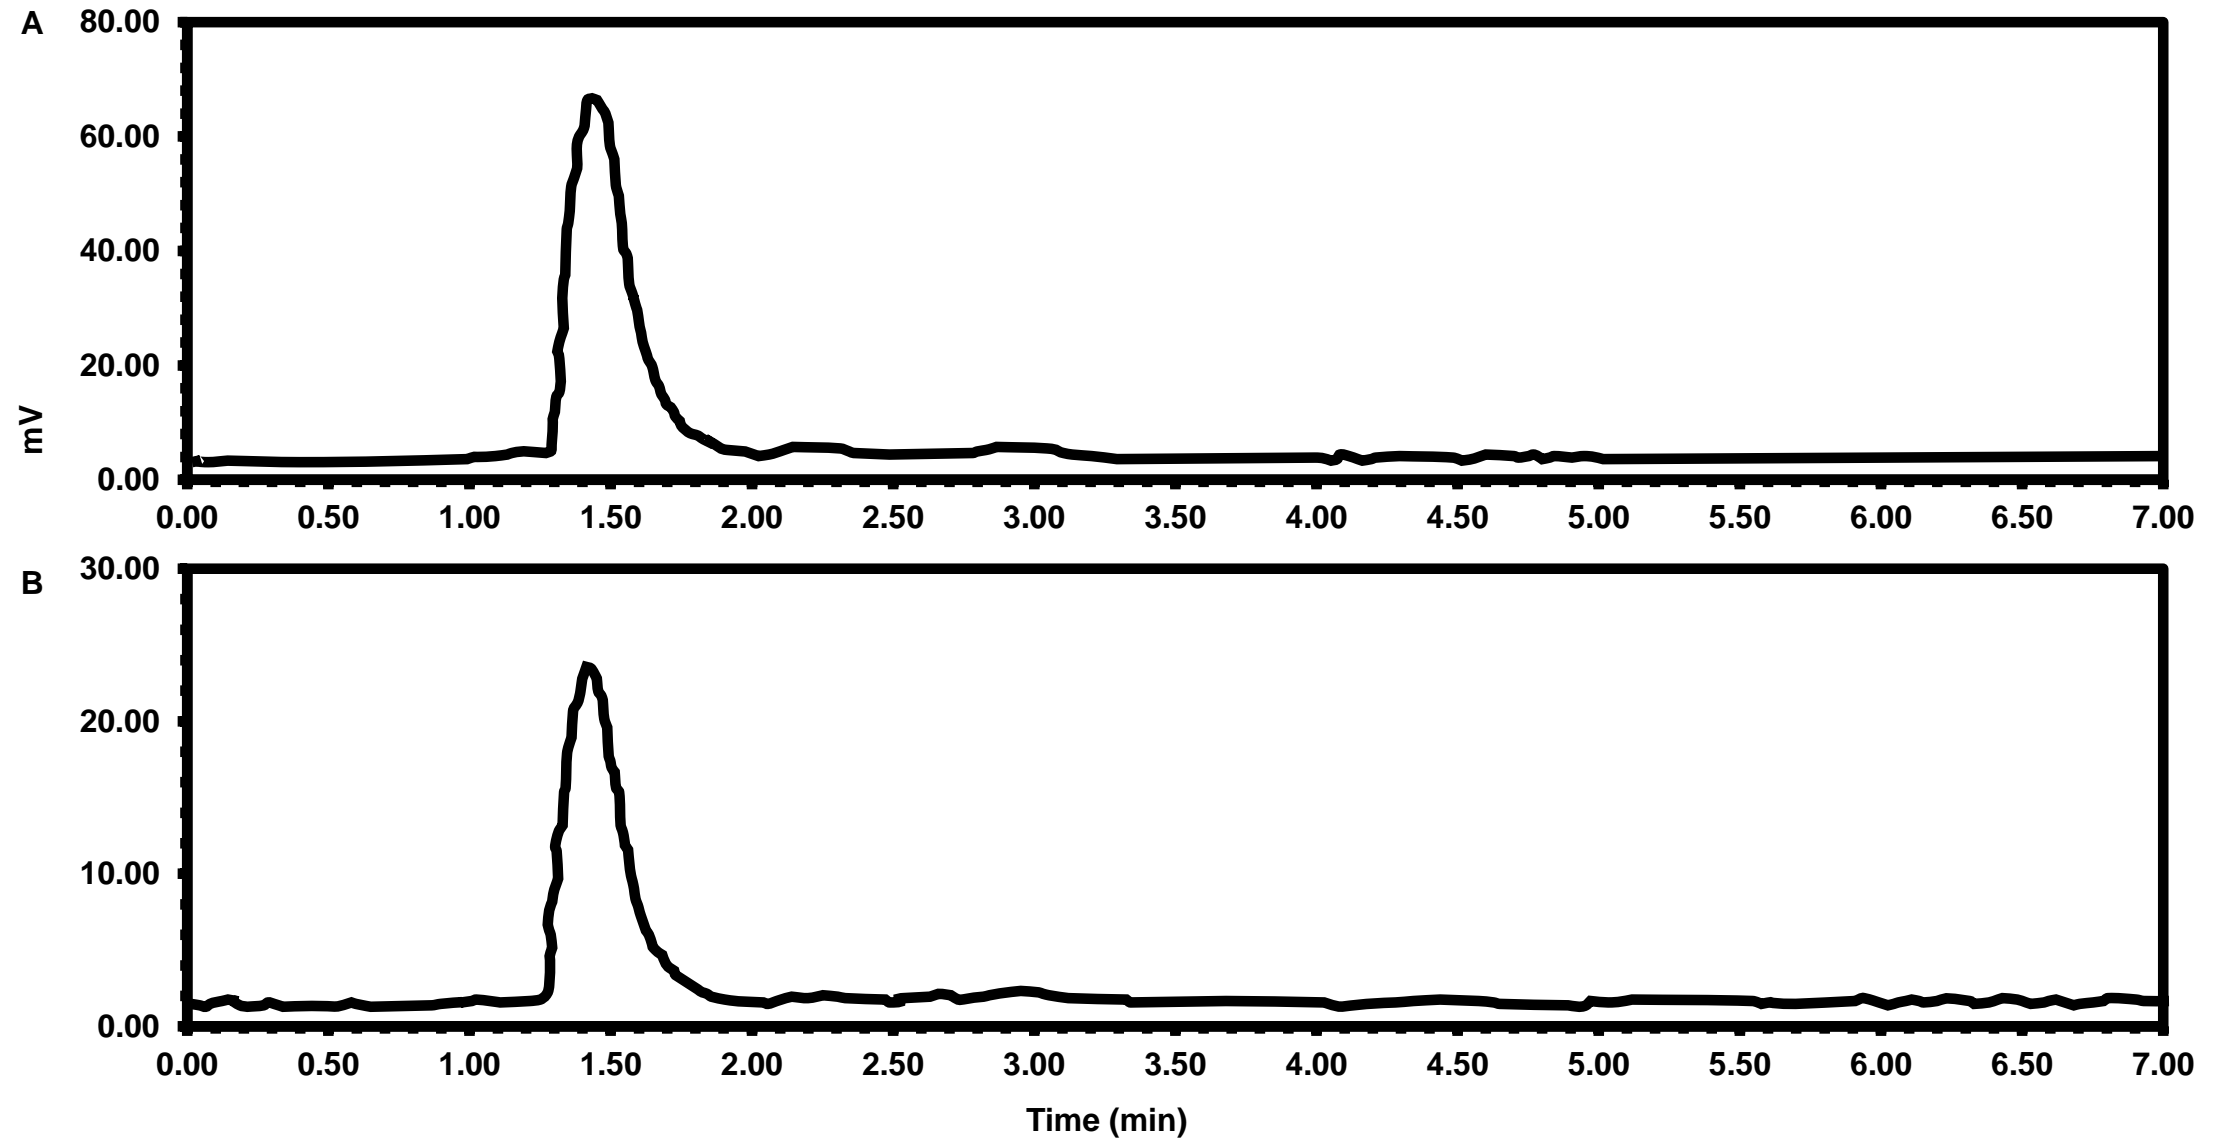

**Supplemental Figure 1:** Radio-HPLC of urine samples run on Waters® 4 $\mu$  C18 150 x 3.9 mm column; ACN/Water (0.1% trifluoroacetic acid) 25/75 with flow rate of 1mL/min at different time points after i.v. injection; **A:** 5 min; **B:** 30 min.
